# Supplementary material
Source: PubMed Central journal article supplement (PMC3366858)

**Supplemental Data**

**Supplemental Figure 1. K44A dynamin but not Eps15 inhibits internalization of ET-B after ET-1 stimulation.** Confocal fluorescence microscopic images of BAEC transfected with K44A Dynamin2-eGFP (green) (A) or mutant Eps15-GFP (green) (B) showing localization of ET-B after 5 min stimulation with ET1. Bar represents 50µm.

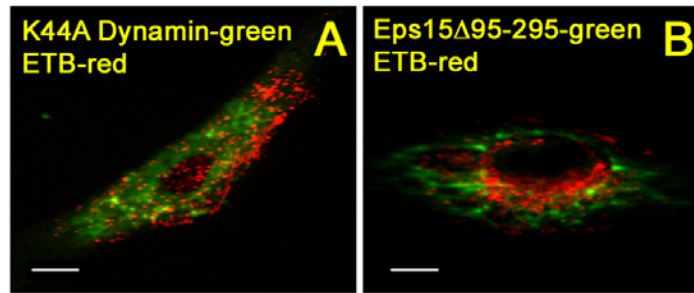

Supplement: supp_M111.338897_jbc.M111.338897-1.pdf [file supp_M111.338897_jbc.M111.338897-1.pdf]
