# Supplementary material
Source: PubMed Central journal article supplement (PMC3366858)

**Supplemental Data**

**Supplemental Figure 2. shRNA lentiviral transduction particle to cav1 reduces caveolin-1 expression by >80% in cultured endothelial cells.** Western blot analysis of BAEC infected for 24hrs with either caveolin-1 (shCav1) or a control (shCont) shRNA lentiviral transduction particle. Cells were treated with detergent to solubilize the proteins which were then detected using antibodies to either caveolin-1 or  $\beta$ -actin. The constant  $\beta$ -Actin signal confirms equal protein loads of each gel lane.

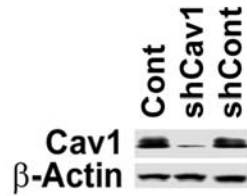

Supplement: supp_M111.338897_jbc.M111.338897-2.pdf [file supp_M111.338897_jbc.M111.338897-2.pdf]
